# Supplementary material
Source: MDPI journal article supplement (https://www.mdpi.com/2413-4155/4/1/5)
Supplement: s1 [file s1]

Synthesis, Structural Characterization, and Biological Activities of Organically Templated Cobalt Phosphite (H<sub>2</sub>DAB)[Co(H<sub>2</sub>PO<sub>3</sub>)<sub>4</sub>]·2H<sub>2</sub>O

<https://doi.org/10.3390/sci4010005>

Supplementary File

Figure S1. Asymmetric unit of (H<sub>2</sub>DAB)[Co(H<sub>2</sub>PO<sub>3</sub>)<sub>4</sub>]·2H<sub>2</sub>O. Thermal ellipsoids are shown at 60% probability.

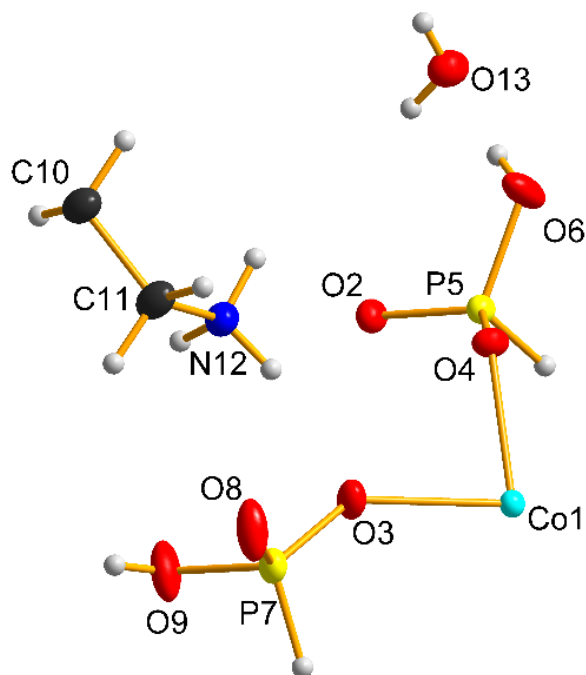

Figure S2. A fragment of the structure of (H<sub>2</sub>DAB)[Co(H<sub>2</sub>PO<sub>3</sub>)<sub>4</sub>]·2H<sub>2</sub>O along [010], showing the infinite four-membered ring chain propagating along [100]. Polyhedrons: cyan [CoO<sub>6</sub>], yellow [H<sub>2</sub>PO<sub>3</sub>].

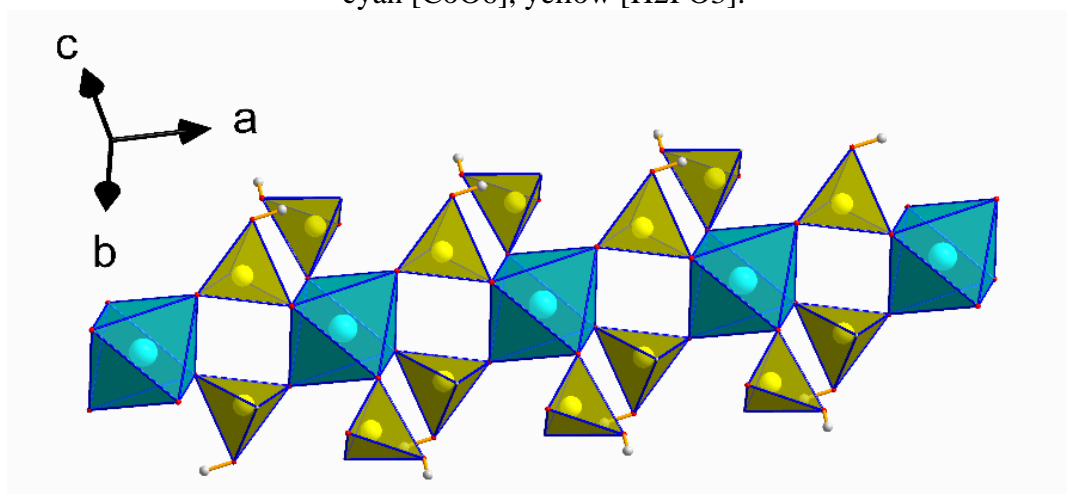

Figure S3. The crystal structure of  $(\text{H}_2\text{DAB})[\text{Co}(\text{H}_2\text{PO}_3)_4] \cdot 2\text{H}_2\text{O}$  in a projection along c-axis emphasizing the hydrogen bonds (dashed lines).

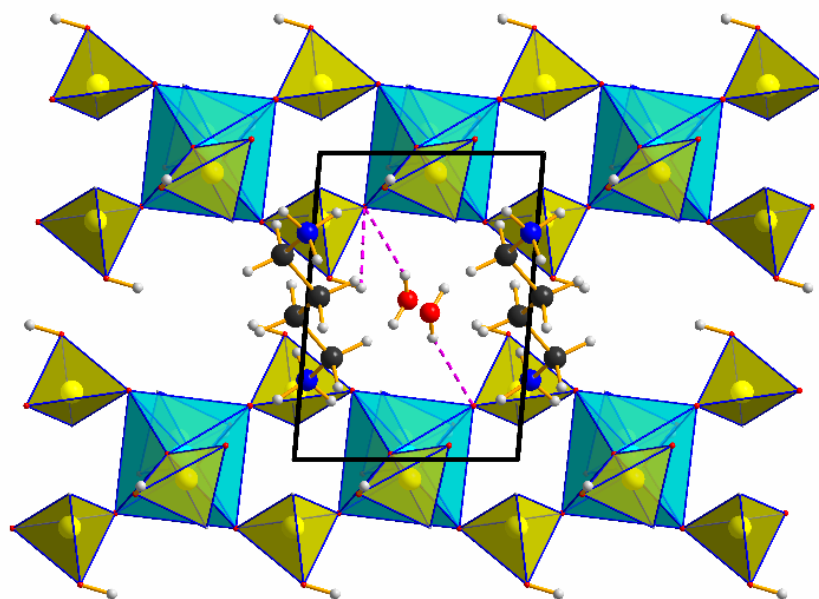

Figure S4. Infrared spectrum of  $(\text{H}_2\text{DAB})[\text{Co}(\text{H}_2\text{PO}_3)_4] \cdot 2\text{H}_2\text{O}$ .

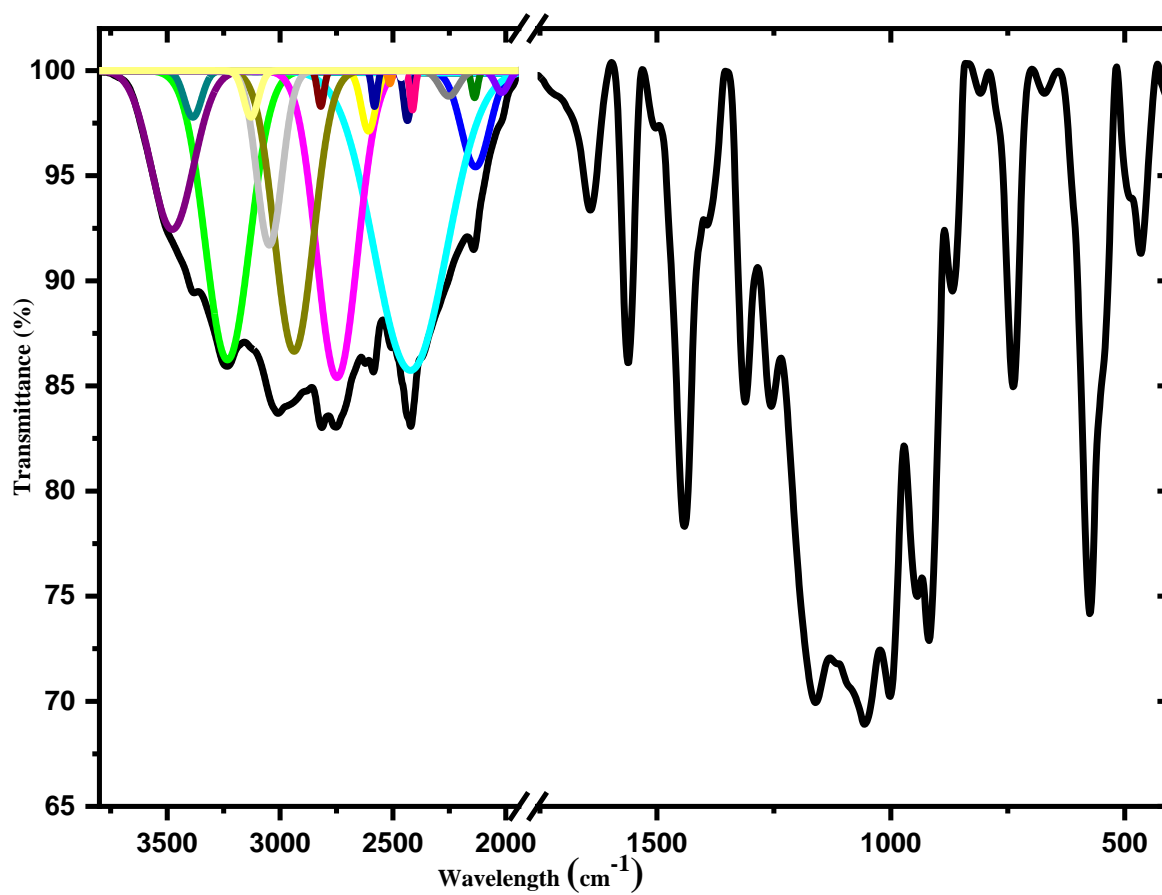

Figure S5. Thermogravimetric (TG) and differential thermal analysis (TDA) curves of  $(\text{H}_2\text{DAB})[\text{Co}(\text{H}_2\text{PO}_3)_4] \cdot 2\text{H}_2\text{O}$ .

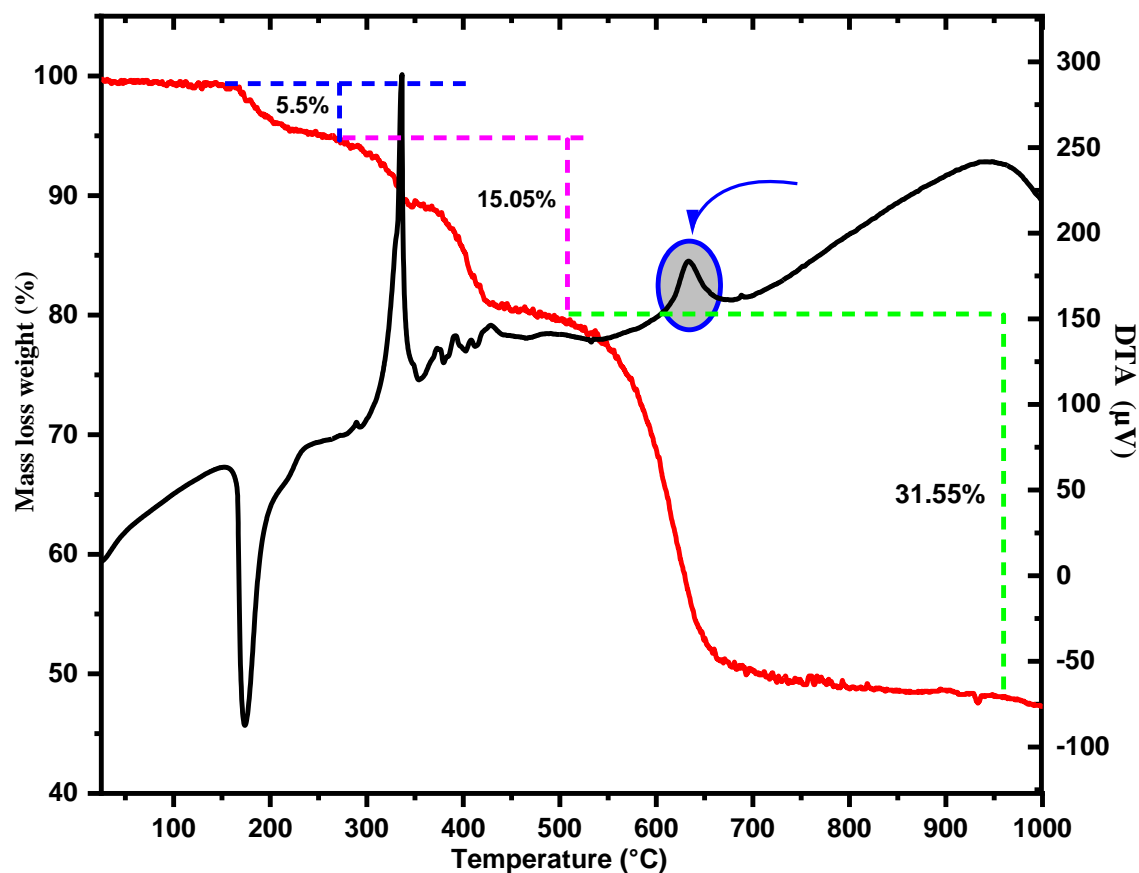

Figure S6. Antimicrobial activity of  $(\text{H}_2\text{DAB})[\text{Co}(\text{H}_2\text{PO}_3)_4] \cdot 2\text{H}_2\text{O}$  against *Candida albicans*, *Saccharomyces cerevisiae*, *Escherichia coli*, *Staphylococcus epidermidis* and *Steinernema feltiae*.

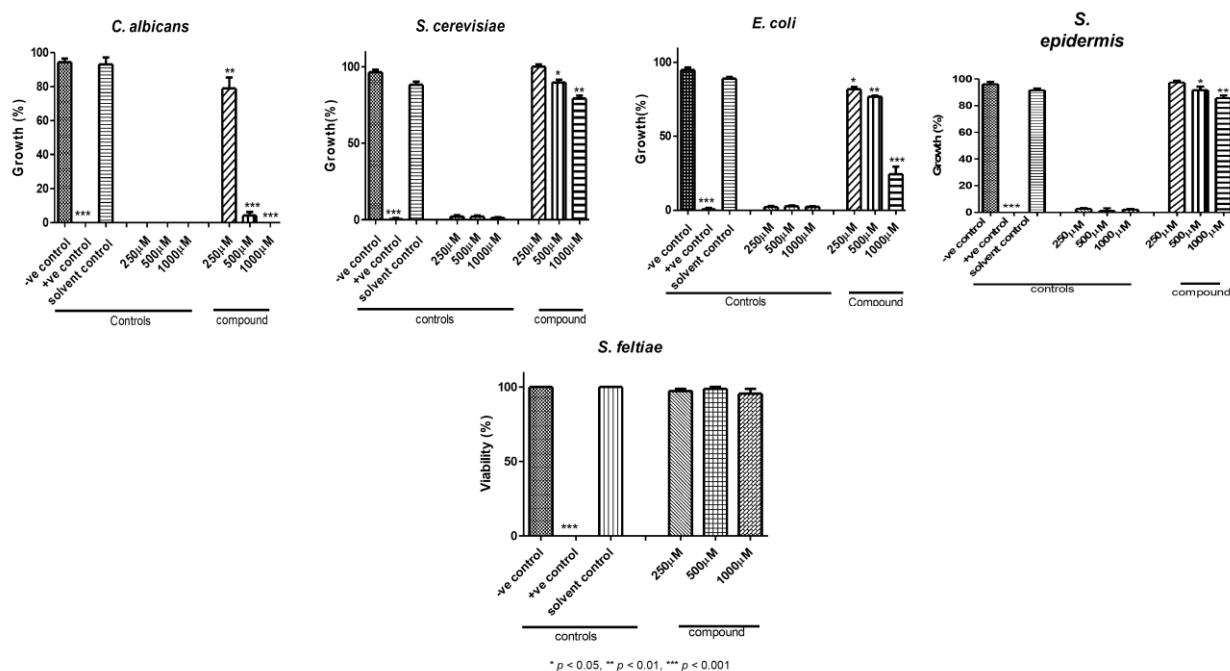

Table S1. Experimental X-ray data collection from (H2DAB)[Co(H2PO3)4]·2H2O.

|                                                                                      |                                                                                                                                    |
|--------------------------------------------------------------------------------------|------------------------------------------------------------------------------------------------------------------------------------|
| Chemical Formula                                                                     | (C <sub>4</sub> H <sub>14</sub> N <sub>2</sub> )[Co(H <sub>2</sub> PO <sub>3</sub> ) <sub>4</sub> ]·2H <sub>2</sub> O              |
| Mr (g/mol)                                                                           | 509.08                                                                                                                             |
| F(000)                                                                               | 263.9                                                                                                                              |
| Symmetry, S.G.                                                                       | Triclinic P-1 (n. 2)                                                                                                               |
| Cell parameters/V                                                                    | A = 5.4814 (3) Å, b = 7.5515 (4) Å, c = 10.8548 (6) Å, α = 88.001 (4)°, β = 88.707 (5)°, γ = 85.126 (5)°/447.33 (4) Å <sup>3</sup> |
| Z                                                                                    | 1                                                                                                                                  |
| λ (Mo Kα radiation) (Å)                                                              | 0.71073                                                                                                                            |
| T(K)/μ(mm <sup>-1</sup> )                                                            | 298/1.39                                                                                                                           |
| Crystal size (mm)                                                                    | 0.25 × 0.25 × 0.3                                                                                                                  |
| Measured reflections/independent reflections (reflections with I ≥ 2σ(I))/parameters | 9480/2005 (1878)/137                                                                                                               |
| Θmin—Θmax (°)/Rint                                                                   | 1.9–27.8/0.024                                                                                                                     |
| Reciprocal space limiting indices                                                    | h: -6–7, k: -9–9, l: -13–14                                                                                                        |
| R[F <sup>2</sup> > 2σ(F <sup>2</sup> )]/wR(F <sup>2</sup> )/G.O.F.                   | 0.026/0.072/1.03                                                                                                                   |

Table S2. Hydrogen bonding network in the framework of (H2DAB)[Co(H2PO3)4]·2H2O.

| D-H...A       | D-H/Å    | H...A/Å  | D...A/Å   | DHA/°   |
|---------------|----------|----------|-----------|---------|
| O6-H6...O13   | 0.80 (3) | 1.80 (3) | 2.605 (2) | 175 (3) |
| O9-H9...O8    | 0.82 (1) | 1.77 (1) | 2.574 (2) | 169(1)  |
| N12-H12A...O6 | 0.89 (1) | 2.16 (1) | 2.900 (2) | 140 (1) |
| N12-H12B...O3 | 0.89 (1) | 2.02 (1) | 2.887 (2) | 166 (1) |
| N12-H12C...O8 | 0.89 (1) | 1.91 (1) | 2.776 (2) | 165 (1) |
| O13-H13A...O2 | 0.71 (3) | 2.22 (3) | 2.888 (2) | 159 (3) |
| O13-H13B...O4 | 0.76 (3) | 2.11 (3) | 2.863 (2) | 179 (4) |
